# Supplementary material for: Practical lessons in implementing frailty assessments for hospitalised patients with COPD
Source: PubMed Central journal article supplement — BMJ Open Qual. 2020 Jan 9;9(1):e000782. doi: 10.1136/bmjoq-2019-000782 (PMC7011889; doi:10.1136/bmjoq-2019-000782), 2020-01-09
Supplement: bmjoq-2019-000782supp001.pdf [file bmjoq-2019-000782supp001.pdf]

## Appendix 1. The Clinical Frailty Scale (1)

### Clinical Frailty Scale\*

 **1 Very Fit** – People who are robust, active, energetic and motivated. These people commonly exercise regularly. They are among the fittest for their age.

 **2 Well** – People who have **no active disease symptoms** but are less fit than category 1. Often, they exercise or are very **active occasionally**, e.g. seasonally.

 **3 Managing Well** – People whose **medical problems are well controlled**, but are **not regularly active** beyond routine walking.

 **4 Vulnerable** – While **not dependent** on others for daily help, often **symptoms limit activities**. A common complaint is being "slowed up", and/or being tired during the day.

 **5 Mildly Frail** – These people often have **more evident slowing**, and need help in **high order IADLs** (finances, transportation, heavy housework, medications). Typically, mild frailty progressively impairs shopping and walking outside alone, meal preparation and housework.

 **6 Moderately Frail** – People need help with **all outside activities** and with **keeping house**. Inside, they often have problems with stairs and need **help with bathing** and might need minimal assistance (cuing, standby) with dressing.

 **7 Severely Frail** – **Completely dependent for personal care**, from whatever cause (physical or cognitive). Even so, they seem stable and not at high risk of dying (within ~ 6 months).

 **8 Very Severely Frail** – **Completely dependent**, approaching the end of life. Typically, they could not recover even from a minor illness.

 **9 Terminally Ill** – Approaching the end of life. This category applies to people with a **life expectancy <6 months**, who are **not otherwise evidently frail**.

**Scoring frailty in people with dementia**

The degree of frailty corresponds to the degree of dementia. Common **symptoms in mild dementia** include forgetting the details of a recent event, though still remembering the event itself, repeating the same question/story and social withdrawal.

In **moderate dementia**, recent memory is very impaired, even though they seemingly can remember their past life events well. They can do personal care with prompting.

In **severe dementia**, they cannot do personal care without help.

\* I. Canadian Study on Health & Aging. Revised 2008.  
2.K. Rodwood et al. A global clinical measure of fitness and frailty in elderly people. CMAJ 2005;173:489-495.

© 2008. Version 1.2\_04. All rights reserved. Geriatric Medicine Research, Dalhousie University, Halifax, Canada. Permission granted to copy for research and educational purposes only.



**DALHOUSIE UNIVERSITY**  
Inspiring Minds
